# Supplementary material
Source: PubMed Central journal article supplement (PMC5491381)
Supplement: NIHMS834469-supplement-01.pdf [file NIHMS834469-supplement-01.pdf]

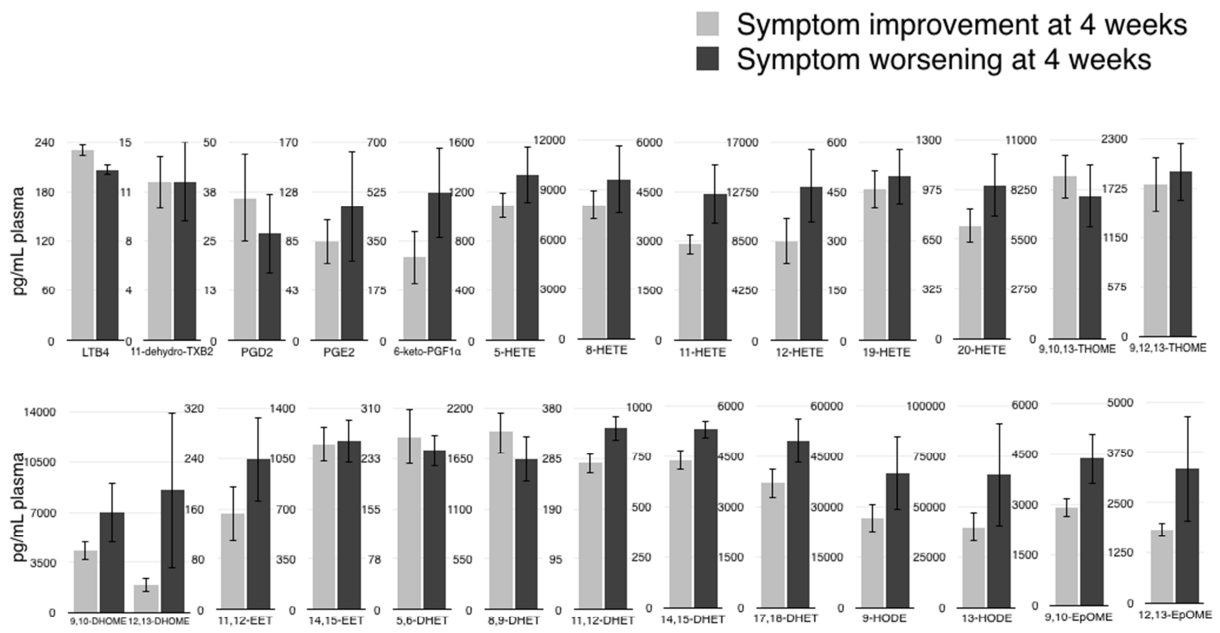

Figure E1.

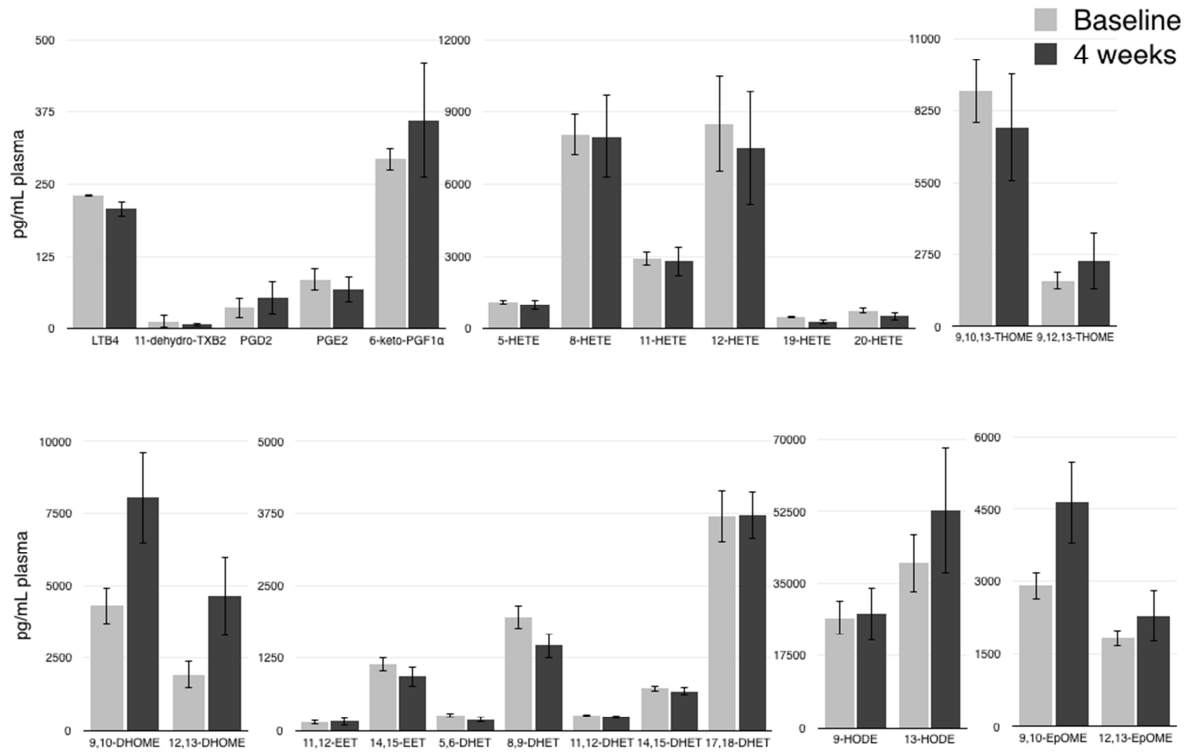

Figure E2A.

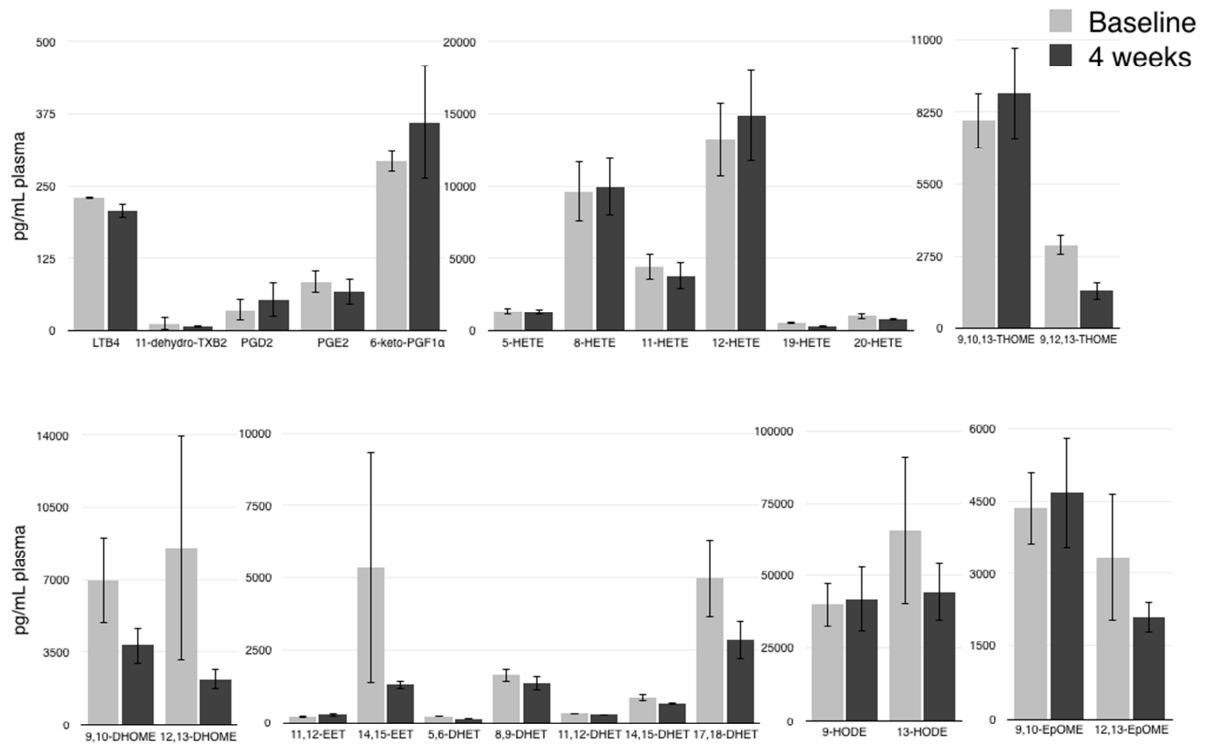

Figure E2B.

1 **Figure E1.**

2 Baseline plasma eicosanoid levels in patients with symptom improvement and with  
3 symptom worsening after four weeks of aspirin treatment. Data are expressed as mean  
4 values  $\pm$ SE.

5

6 **Figure E2.**

7 Change in plasma eicosanoid levels after four weeks of aspirin treatment in patients  
8 with symptom improvement (**A**) and in patients with symptom worsening (**B**). Data are  
9 expressed as mean values  $\pm$ SE.

10
